# Supplementary material for: Higher Functional Connectivity of Ventral Attention and Visual Network to Maintain Cognitive Performance in White Matter Hyperintensity
Source: PubMed Central journal article supplement (PMC10389834; doi:10.14336/ad.2022.1206), 2023-08-01
Supplement: AD-14-4-1472-s.pdf [file AD-14-4-1472-s.pdf]

SUPPLEMENTARY DATA

# **Higher Functional Connectivity of Ventral Attention and Visual Network to Maintain Cognitive Performance in White Matter Hyperintensity**

**Xiao Zhu<sup>1</sup>, Ying Zhou, Wansi Zhong, Yifei Li, Junjun Wang, Yuping Chen, Ruoxia Zhang, Jianzhong Sun, Yu Sun, Min Lou**

# SUPPLEMENTARY DATA

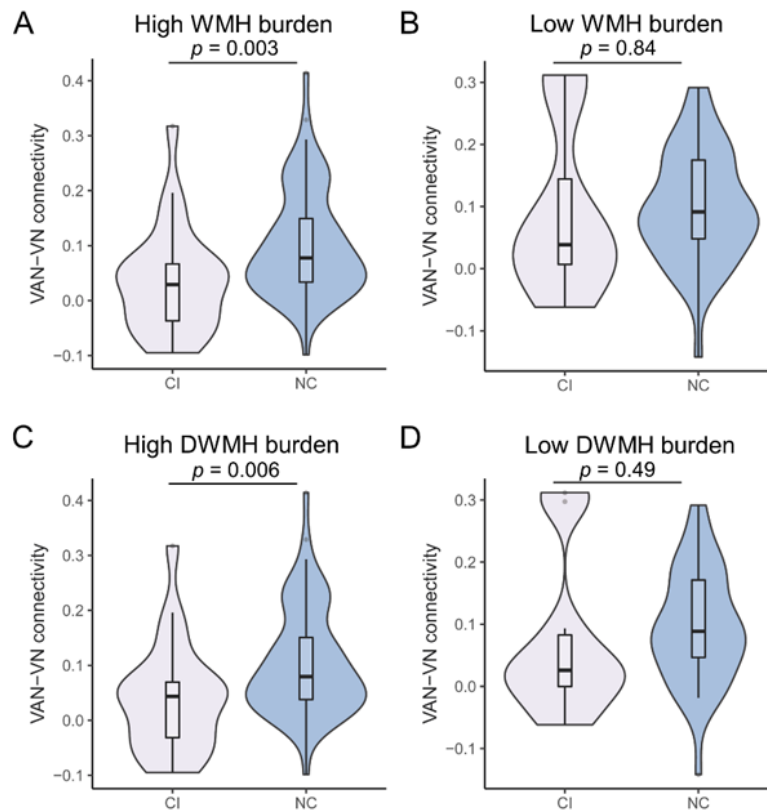

**Supplementary Figure 1. Comparison of ventral attention network (VAN)-visual network (VN) connectivity between cognitive-impairment (CI) and normal-cognition (NC) groups in different subgroups.** A) Violin plot of high WMH burden subgroup analysis in CI ( $n = 25$ ,  $M = 0.035$  ( $SE = 0.019$ )) and NC ( $n = 67$ ,  $M = 0.103$  ( $SE = 0.012$ )) groups. B) Violin plot of low WMH burden subgroup analysis in CI ( $n = 8$ ,  $M = 0.090$  ( $SE = 0.049$ )) and NC ( $n = 39$ ,  $M = 0.098$  ( $SE = 0.014$ )) groups. C) Violin plot of high DWMH burden subgroup analysis in CI ( $n = 23$ ,  $M = 0.038$  ( $SE = 0.020$ )) and NC ( $n = 66$ ,  $M = 0.104$  ( $SE = 0.012$ )) groups. D) Violin plot of low DWMH burden subgroup analysis in CI ( $n = 10$ ,  $M = 0.071$  ( $SE = 0.041$ )) and NC ( $n = 40$ ,  $M = 0.095$  ( $SE = 0.014$ )) groups. Violins show the data distribution. Boxes represent the interquartile range, vertical lines show the maximum and minimum values, and horizontal lines indicate the median.

**Supplementary Table 1.** Comparison of VAN-related between-network connectivity between CI and NC groups.

|                 | CI group (n=33) *    | NC group (n=106) *   | <i>p</i>          | FDR <i>p</i>      |
|-----------------|----------------------|----------------------|-------------------|-------------------|
| VAN-AN          | 0.179 (0.020)        | 0.190 (0.012)        | 0.66              | 0.72              |
| VAN-CO          | 0.102 (0.016)        | 0.105 (0.009)        | 0.85              | 0.85              |
| VAN-CP          | 0.016 (0.016)        | 0.063 (0.012)        | 0.05              | 0.10              |
| <b>VAN-DMN</b>  | <b>0.070 (0.017)</b> | <b>0.185 (0.011)</b> | <b>&lt; 0.001</b> | <b>&lt; 0.001</b> |
| VAN-DAN         | 0.042 (0.012)        | 0.056 (0.009)        | 0.42              | 0.52              |
| <b>VAN-FPCN</b> | <b>0.068 (0.013)</b> | <b>0.151 (0.010)</b> | <b>&lt; 0.001</b> | <b>&lt; 0.001</b> |
| <b>VAN-RN</b>   | <b>0.010 (0.023)</b> | <b>0.096 (0.012)</b> | <b>0.001</b>      | <b>0.004</b>      |
| VAN-vSM         | 0.001 (0.013)        | 0.018 (0.011)        | 0.43              | 0.52              |
| VAN-dSM         | 0.048 (0.019)        | 0.095 (0.014)        | 0.05              | 0.10              |
| VAN-SN          | 0.128 (0.020)        | 0.149 (0.011)        | 0.36              | 0.52              |
| <b>VAN-VN</b>   | <b>0.048 (0.019)</b> | <b>0.101 (0.009)</b> | <b>0.008</b>      | <b>0.02</b>       |

Note. CI, cognitive-impairment; NC, normal-cognition; AN, auditory network; CO, cingulo-opercular network; CP, cingulo-parietal network; DMN, default mode network; DAN, dorsal attention network; FPCN, fronto-parietal control network; RN, retrosplenial-temporal network; vSM, ventral somatomotor network; dSM, dorsal somatomotor network; SN, salience network; VAN, ventral attention network; VN, visual network.

\* Data in parentheses are SE.

# SUPPLEMENTARY DATA

**Supplementary Table 2.** Logistic regression analysis for normal cognition.

|                                                                     | OR (95% Confidence Interval) | <i>p</i> |
|---------------------------------------------------------------------|------------------------------|----------|
| Model 1: adjusting for age, sex, and years of education             |                              |          |
| VAN-DMN                                                             | 1.20e5 (5.97e2-2.41e7)       | < 0.001  |
| VAN-FPCN                                                            | 2.68e4 (1.12e2-6.42e6)       | < 0.001  |
| VAN-RN                                                              | 5.37e2 (9.63-2.99e4)         | 0.002    |
| VAN-VN                                                              | 4.23e2 (3.69-4.85e4)         | 0.01     |
| Model 2: adjusting for age, sex, years of education, and WMH scores |                              |          |
| VAN-DMN                                                             | 1.16e5 (5.80e2-2.30e7)       | < 0.001  |
| VAN-FPCN                                                            | 2.66e4 (1.12e2-6.32e6)       | < 0.001  |
| VAN-RN                                                              | 5.37e2 (9.53-3.03e4)         | 0.002    |
| VAN-VN                                                              | 3.96e2 (3.41-4.58e4)         | 0.01     |

Note. VAN, ventral attention network; DMN, default mode network; FPCN, fronto-parietal control network; RN, retrosplenial-temporal network; VN, visual network; WMH, white matter hyperintensity.

**Supplementary Table 3.** Comparison of VAN-related between-network connectivity between CD and CND groups.

|               | CD group (n=26) *    | CND group (n=113) *  | <i>p</i>     | FDR <i>p</i> |
|---------------|----------------------|----------------------|--------------|--------------|
| VAN-DMN       | 0.138 (0.020)        | 0.162 (0.012)        | 0.36         | 0.69         |
| VAN-FPCN      | 0.120 (0.023)        | 0.134 (0.010)        | 0.52         | 0.69         |
| VAN-RN        | 0.066 (0.022)        | 0.078 (0.012)        | 0.69         | 0.69         |
| <b>VAN-VN</b> | <b>0.050 (0.013)</b> | <b>0.098 (0.010)</b> | <b>0.005</b> | <b>0.02</b>  |

Note. CD, cognitive-decline; CND, cognitive non-decline; VAN, ventral attention network; DMN, default mode network; FPCN, fronto-parietal control network; RN, retrosplenial-temporal network; VN, visual network.

\* Data in parentheses are SE.

**Supplementary Table 4.** Logistic regression analysis for cognitive non-decline.

|                                                                                    | OR (95% Confidence Interval) | <i>p</i> |
|------------------------------------------------------------------------------------|------------------------------|----------|
| Model 1: adjusting for age, sex, and years of education                            |                              |          |
| VAN-VN                                                                             | 1.640e2 (0.993-2.710e4)      | 0.05     |
| Model 2: adjusting for age, sex, years of education, and baseline MMSE             |                              |          |
| VAN-VN                                                                             | 6.035e2 (2.288-1.592e5)      | 0.02     |
| Model 3: adjusting for age, sex, years of education, baseline MMSE, and WMH scores |                              |          |
| VAN-VN                                                                             | 6.043e2 (2.288-1.596e5)      | 0.02     |

Note. VAN, ventral attention network; VN, visual network; MMSE, Mini-Mental State Examination; WMH, white matter hyperintensity.

# SUPPLEMENTARY DATA

**Supplementary Table 5.** The number of ROIs for each of the 12 functional networks

| Network | AN | CO | CP | DMN | DAN | FPCN | RN | vSM | dSM | SN | VAN | VN |
|---------|----|----|----|-----|-----|------|----|-----|-----|----|-----|----|
| Number  | 24 | 40 | 5  | 41  | 32  | 24   | 8  | 8   | 38  | 4  | 23  | 39 |

Note. AN, auditory network; CO, cingulo-opercular network; CP, cingulo-parietal network; DMN, default mode network; DAN, dorsal attention network; FPCN, fronto-parietal control network; RN, retrosplenial-temporal network; vSM, ventral somatomotor network; dSM, dorsal somatomotor network; SN, salience network; VAN, ventral attention network; VN, visual network; ROIs, regions of interest.

**Supplementary Table 6.** The comparison of clinical, demographic, and MRI characteristics between included and excluded participants.

| Characteristics                                    | Included<br>(N = 139) | Excluded<br>(N = 1018) | <i>p</i>          |
|----------------------------------------------------|-----------------------|------------------------|-------------------|
| Demographic and neuropsychological characteristics |                       |                        |                   |
| Age (mean (SD))                                    | 62.7 (8.9)            | 61.4 (8.3)             | 0.10              |
| Sex (female%)                                      | 69 (49.6%)            | 452 (44.4%)            | 0.24              |
| Years of education (mean (SD))                     | 8.0 (4.8)             | 8.3 (4.0)              | 0.57              |
| MMSE (mean (SD))                                   | 26.4 (3.3)            | 25.5 (4.3)             | <b>0.002</b>      |
| MRI features                                       |                       |                        |                   |
| PWMH scores (mean (SD))                            | 1.9 (0.9)             | 1.7 (0.9)              | <b>0.001</b>      |
| DWMH scores (mean (SD))                            | 2.0 (0.9)             | 1.5 (1.0)              | <b>&lt; 0.001</b> |
| Risk factors                                       |                       |                        |                   |
| Hypertension (yes%)                                | 80 (57.6%)            | 672 (66.0%)            | <b>0.05</b>       |
| Hyperlipidemia (yes%)                              | 30 (21.6%)            | 327 (32.1%)            | <b>0.01</b>       |
| Diabetes (yes%)                                    | 27 (19.4%)            | 198 (19.4%)            | > 0.99            |
| Smoking (yes%)                                     | 39 (28.1%)            | 363 (35.7%)            | 0.08              |
| Drinking (yes%)                                    | 36 (25.9%)            | 438 (43.0%)            | <b>&lt; 0.001</b> |

Note. MMSE, Mini-Mental State Examination; PWMH, periventricular white matter hyperintensity; DWMH, deep periventricular white matter hyperintensity.
